# Supplementary material for: Compliance With Vaccination Recommendations Among Patients With Multiple Myeloma: A Real World Experience
Source: PubMed Central journal article supplement — Hemasphere. 2021 Jun 25;5(7):e597. doi: 10.1097/HS9.0000000000000597 (PMC8232067; doi:10.1097/hs9.0000000000000597), 2021-06-25
Supplement: hs9-5-e597-s001.pdf [file hs9-5-e597-s001.pdf]

## Vaccination Survey

### Dear Patients,

we kindly ask you to take part in this initiative. This anonymous survey is intended to increase the awareness of myeloma patients and their care team on the importance of vaccinations for the prophylaxis of infections.

**Many thanks for the few minutes of your time. We kindly ask for completion of the survey until December 15, 2020.**

**1) I am member of one (or more) of the following self-help groups or regularly inform myself on the websites of (multiple answers possible):**

- Myelom Deutschland e.V.
- Multiples Myelom Selbsthilfe Österreich
- Myelom-Lymphom Hilfe Österreich
- I am not a member of a self-help group

**2) Year of birth**

**3) Sex**     male     female

**4) Residence**

**5) Are you a myeloma patient or a relative?**

- I am a myeloma patient
- I am a relative living in the same household (please continue at question 13)

**6) When have you been diagnosed with multiple myeloma?**

Year/Month

**7) When was treatment started?**

Year/Month

**8) How many treatment lines have you received?**

- 1     2     3     4     5     >5

**9) Which was your first treatment?**

**10) Did you undergo an autologous stem cell transplantation?**

yes  no

**11) How many infections did you have the year before multiple myeloma was diagnosed?**

none  1-3  4-6  >6

**12) How many infections did you have during the first 6 months of your first treatment?**

none  1-3  4-6  >6

**13) Did you receive any recommendations for vaccination from your doctor/care team, and if yes, for which vaccines?**

**Which vaccinations have you actually received? (please specify)**

|                   | Recommended by doctor                                    | Vaccinations I have received                             | Year/Month (last shot) |  |
|-------------------|----------------------------------------------------------|----------------------------------------------------------|------------------------|--|
| Influenza         | <input type="checkbox"/> yes <input type="checkbox"/> no | <input type="checkbox"/> yes <input type="checkbox"/> no | If yes, when?          |  |
| Pneumococci       | <input type="checkbox"/> yes <input type="checkbox"/> no | <input type="checkbox"/> yes <input type="checkbox"/> no | If yes, when?          |  |
| Herpes zoster     | <input type="checkbox"/> yes <input type="checkbox"/> no | <input type="checkbox"/> yes <input type="checkbox"/> no | If yes, when?          |  |
| Hepatitis A       | <input type="checkbox"/> yes <input type="checkbox"/> no | <input type="checkbox"/> yes <input type="checkbox"/> no | If yes, when?          |  |
| Hepatitis B       | <input type="checkbox"/> yes <input type="checkbox"/> no | <input type="checkbox"/> yes <input type="checkbox"/> no | If yes, when?          |  |
| TBE*              | <input type="checkbox"/> yes <input type="checkbox"/> no | <input type="checkbox"/> yes <input type="checkbox"/> no | If yes, when?          |  |
| Haemophilus infl. | <input type="checkbox"/> yes <input type="checkbox"/> no | <input type="checkbox"/> yes <input type="checkbox"/> no | If yes, when?          |  |
| MMR**             | <input type="checkbox"/> yes <input type="checkbox"/> no | <input type="checkbox"/> yes <input type="checkbox"/> no | If yes, when?          |  |
| DTP***            | <input type="checkbox"/> yes <input type="checkbox"/> no | <input type="checkbox"/> yes <input type="checkbox"/> no | If yes, when?          |  |

\*tick borne encephalitis, \*\* measles/mumps/rubella, \*\*\*diphtheria/tetanus/pertussis

**14) The response to vaccination can be verified through investigation of antibody levels. This information can be helpful for further recommendations on vaccination. Have you had an investigation of antibody levels after one of the following vaccinations (multiple answers possible)?**

Influenza

Pneumococci

Herpes zoster

Other:

**15) Do you object to vaccinations in general?**

- yes  no (please continue at question 17)

**16) If yes, what are your reasons? (multiple answers possible)**

- I think vaccinations are not effective/helpful
- I am afraid of short-term side effects
- I am afraid of long-term side effects
- Skepticism towards pharmaceutical industry
- Other:

**17) Vaccines against COVID-19 will be available soon; will you be willing to get vaccinated?**

- yes (please continue at question 19)  no

**18) If no, what are your reasons? (multiple answers possible)**

- I think these vaccines will not be effective/helpful
- I am afraid of short-term side effects
- I am afraid of long-term side effects
- Skepticism towards pharmaceutical industry
- No experience on long-term effects on safety is available
- Other:

**19) Have you already had COVID-19?**

- yes  no

**20) How satisfied are you with the quality of your communication regarding vaccination with your doctor/care team?**

- very satisfied  satisfied  sufficient  dissatisfied  very dissatisfied

**Thank you again for taking the time to complete this survey!**

**Myelom-Lymphom Hilfe Österreich, Multiples Myelom Selbsthilfe Österreich, Myelom Deutschland e.V. and Wilhelminen Cancer Research Institute, Vienna, Austria.**

Supplementary Table 1. Recommendations for vaccination in patients with multiple myeloma<sup>4</sup>

| Infections                                          | Vaccine type                                                               | Recommendation                                                                                                                                                                             | Doses                                                                              | Supported by                         | Comments                                                                                                                                     |
|-----------------------------------------------------|----------------------------------------------------------------------------|--------------------------------------------------------------------------------------------------------------------------------------------------------------------------------------------|------------------------------------------------------------------------------------|--------------------------------------|----------------------------------------------------------------------------------------------------------------------------------------------|
| Influenza                                           | Trivalent or quadrivalent (strains selected according seasonal prevalence) | All patients, non-immune family members, close contacts and HCWs                                                                                                                           | 2, if antibody response after 1 <sup>st</sup> administration documented, 1, yearly | CDC<br>NCCN                          | CDC recommends high-dose flu vaccine in people 65 years of age or older                                                                      |
| Hepatitis A                                         | Inactivated hepatitis A vaccine                                            | Patients travelling to areas of high endemicity                                                                                                                                            | 2                                                                                  | NCCN                                 | May test ≥1 month after last dose                                                                                                            |
| Hepatitis B                                         | Recombinant hepatitis B vaccine                                            | Patients travelling to areas of high endemicity, behavioral /occupational exposure, hemodialysis                                                                                           | 3                                                                                  | NCCN                                 | May test ≥1 month after last dose, Revaccination in non-responder, consider booster dose if antibody level <10IU/L, may retest every 5 years |
| Pneumococci                                         | PCV13                                                                      | All patients                                                                                                                                                                               | 1                                                                                  | CDC, IDSA, NCCN                      | Conjugated vaccine to a mutant diphtheria toxin induces T cell response                                                                      |
|                                                     | PV23                                                                       | >2 months, or 6-12 months after PCV13 according to other CDC                                                                                                                               | 1-3 Repeat in 3 years                                                              | NCCN for pts <65 years at first dose | Polysaccharide vaccine, less immunogenic than PCV                                                                                            |
| Haemophilus influenzae                              | Haemophilus influenzae type B conjugate                                    | All patients                                                                                                                                                                               | 1                                                                                  | CDC, NCCN <sup>1</sup>               | May test ≥ 1 month after last dose<br><sup>1</sup> also in patients travelling to endemic areas or in case of local outbreak                 |
| Meningococci                                        | Meningococcal conjugate                                                    | Patients with asplenia, complement deficiency, recurrent episodes of bacterial infections*                                                                                                 | 1                                                                                  | CDC, NCCN <sup>1</sup>               | <sup>1</sup> also in patients travelling to endemic areas or in case of local outbreak                                                       |
| Tetanus, diphtheria toxoids, and pertussis combined | Tetanus and diphtheria toxoids, and acellular pertussis                    | Patients who did not receive a primary vaccination for TDP, or a booster dose of tetanus and diphtheria toxoid vaccine. May be limited to tetanus only based on epidemiological prevalence | 3                                                                                  | CDC, NCCN, WHO                       | May test for tetanus antibody titers at baseline and ≥1 month after last dose<br>Booster dose of tetanus every 10 years                      |
| Herpes zoster                                       |                                                                            |                                                                                                                                                                                            |                                                                                    |                                      |                                                                                                                                              |
|                                                     | Recombinant VZV glycoprotein E vaccine                                     | All patients with MM                                                                                                                                                                       | 2                                                                                  | EMN                                  | Antibody response in 80.4%                                                                                                                   |
|                                                     | Inactivated VZV vaccine <sup>1</sup>                                       | All patients with MM                                                                                                                                                                       | 4                                                                                  | EMN                                  | Estimated vaccine efficacy: 63%                                                                                                              |

<sup>1</sup> only in case Recombinant VZV glycoprotein E vaccine is not available, CDC-Center of Disease Control, NCCN- National Comprehensive Cancer Network, IDSA- Infectious Disease Society of America, EMN- European Myeloma Network

Supplementary Table 2. Preliminary considerations for vaccination of patients with multiple myeloma against COVID-19

| Infections | Vaccine type*                                                                                                                                                     | Recommendation                                                                                                                                                                  | Doses                | Supported by | Comments                                                                                                                                                                                                 |
|------------|-------------------------------------------------------------------------------------------------------------------------------------------------------------------|---------------------------------------------------------------------------------------------------------------------------------------------------------------------------------|----------------------|--------------|----------------------------------------------------------------------------------------------------------------------------------------------------------------------------------------------------------|
| SARS-CoV-2 | RNA-vaccine <sup>1,2</sup> ,<br>Adenovirus vector vaccine <sup>3,4,5,5</sup> ,<br>Inactivated SARS-CoV-2 vaccine <sup>6,7</sup> ,<br>Peptide vaccine <sup>8</sup> | All patients with MGUS, SMM, well controlled multiple myeloma. Patients with active disease undergoing therapy may be vaccinated but there is no clear consensus among experts. | 2, for most vaccines | IMS**        | Immune response to vaccination may be impaired by both myeloma induced-immune impairment, and by anti-myeloma therapy. Protective response may be even lower in patients with poorly controlled disease. |

\*approved vaccines at time of writing: <sup>1</sup>Pfizer-BioNtech, <sup>2</sup>Moderna, <sup>3</sup>Sputnik, <sup>4</sup>Oxford-Astra Zeneca, <sup>5</sup>anoSinoBiologics, <sup>6</sup>Janssen Pharmaceutica, <sup>7</sup>Sinovac, <sup>8</sup>Bharat Biotech, <sup>8</sup>Vector Institute, \*\*International Myeloma Society

**Supplementary Table 3: Recommended vaccination schedule after autologous or allogeneic HCT (according to NCCN®)<sup>10</sup>**

| Inactivated Vaccines <sup>1</sup>                                                                                                                                 | Recommended Timing after HCT                                                                                           | Number of Doses           |
|-------------------------------------------------------------------------------------------------------------------------------------------------------------------|------------------------------------------------------------------------------------------------------------------------|---------------------------|
| DTaP (Diphtheria/Tetanus/Acellular Pertussis)                                                                                                                     | 6-12 months                                                                                                            | 3                         |
|                                                                                                                                                                   | 6-12 months                                                                                                            | 3                         |
| Pneumococcal vaccination <ul style="list-style-type: none"> <li>• Conjugated 13-valent vaccine</li> <li>• Upon completion of PCV13 series, then PPSV23</li> </ul> | 6-12 months<br>≥12 months                                                                                              | 3<br>1                    |
| Hepatitis A <sup>2</sup> (Hep A)                                                                                                                                  | 6-12 months                                                                                                            | 2                         |
| Hepatitis B <sup>2</sup> (Hep B)                                                                                                                                  | 6-12 months                                                                                                            | 3                         |
| Meningococcal conjugate vaccine <sup>3</sup>                                                                                                                      | 6-12 months                                                                                                            | 1-2                       |
| Influenza (injectable) <sup>4</sup>                                                                                                                               | 4-6 months                                                                                                             | 1 <sup>4</sup> , annually |
| Inactivated Polio vaccine                                                                                                                                         | 6-12 months                                                                                                            | 3                         |
| Recombinant zoster vaccine                                                                                                                                        | 50-70 days after autologous HCT<br>May be considered after allogeneic HCT <sup>5</sup>                                 | 2                         |
| Human papillomavirus (HPV) vaccine                                                                                                                                | >6-12 months<br>For patients up to age 26, consider up to age 45                                                       | 3                         |
| Live Vaccines                                                                                                                                                     | Recommended Timing after HCT                                                                                           | Number of Doses           |
| Measles/Mumps/Rubella (MMR) <sup>6</sup>                                                                                                                          | ≥24 months<br>(if no GVHD or ongoing immunosuppression and patient is seronegative for measles, mumps, and/or rubella) | 1-2                       |
| Varicella vaccine <sup>6</sup>                                                                                                                                    | ≥24 months<br>(if no GVHD or ongoing immunosuppression and patient is seronegative for varicella)                      | 1                         |
| Zoster vaccine <sup>6,7</sup> (category 3)                                                                                                                        | May be considered at ≥24 months<br>(if no GVHD or ongoing immunosuppression)                                           | 1                         |

<sup>1</sup> Inactivated vaccines may be given as a combined vaccine. Vaccination may be postponed for patients receiving >20mg of prednisone.

<sup>2</sup> Strongly consider if clinically indicated. May consider Hepatitis A and B combined vaccine if immunization for both is needed.

<sup>3</sup> Meningococcal B vaccine should be considered for high-risk patients such as patients with asplenia or complement deficiency or patients receiving eculizumab.

<sup>4</sup> As antibody response may be suboptimal, EMN recommends a second administration, or confirmation of antibody response by adequate testing

<sup>5</sup> Efficacy in allogeneic HCT, in the presence of GVHD, or ongoing immunosuppression as not been established (Bastidas A et al. JAMA 2019;322:123-133)

<sup>6</sup> MMR and varicella/zoster vaccines may be given together or 4 weeks apart

<sup>7</sup> Because of insufficient data on safety and efficacy of live zoster vaccine among HCT recipients, physicians should assess the immune status of each recipient on a case-by-case basis and determine the risk for infection before using the vaccine. Randomized data exist for use of the recombinant zoster vaccine in patients receiving autologous HCTs but not for the live zoster vaccine.
